# Supplementary material for: Dynachromes – dynamic electrochromic polymers capable of property tuning and patterning via multiple constitutional component exchange
Source: Royal Society of Chemistry journal article supplement (doi:10.1039/c3tc31487a), 2013-01-01
Supplement: c3tc31487a.pdf [file c3tc31487a.pdf]

## Supporting Information

### ***Dynachromes*– Dynamic Electrochromic Polymers Capable of Property Tuning and Patterning via Multiple Constitution Component Exchange**

Daminda Navarathne and W. G. Skene\*

Laboratoire de caractérisation photophysique des matériaux conjugués  
Département de chimie  
Université de Montréal  
CP 6128, Centre-ville, Montreal, QC H3C 3J7 Canada  
E-mail: w.skene@umontreal.ca

|                                                                                                                                                                                                                                                    |    |
|----------------------------------------------------------------------------------------------------------------------------------------------------------------------------------------------------------------------------------------------------|----|
| Experimental .....                                                                                                                                                                                                                                 | 3  |
| On-substrate polymerization of 3 .....                                                                                                                                                                                                             | 3  |
| Exchange reaction to prepare 5 from 3 .....                                                                                                                                                                                                        | 3  |
| Patterning by dynamic component exchange .....                                                                                                                                                                                                     | 3  |
| Figure S1. On-substrate polymerization of 1 and 2 followed by ATR-IR spectroscopy .....                                                                                                                                                            | 4  |
| Figure S2. On-substrate preparation of 5 from 3 by exchange with 4 followed by ATR-IR spectroscopy. ATR-IR spectrum of 5 obtained by direct on-substrate condensation of 1 and 4 is also shown for comparison. ....                                | 4  |
| Figure S3. On-substrate preparation of 5 from 3 via exchange with 4 followed by ATR-FTIR spectroscopy. Derivative spectra of 3 and 5 from 1 and 4 are also shown. ....                                                                             | 5  |
| Figure S4. Average film thickness of spray coated films. ....                                                                                                                                                                                      | 6  |
| Figure S5. Cyclic voltammograms of a film of 5 from 3 on ITO measured in 0.1M TBAPF <sub>6</sub> /acetonitrile with Ag/Ag <sup>+</sup> reference and Pt wire counter electrodes, respectively.....                                                 | 7  |
| Figure S6. Cyclic voltammograms of a film of 3 on ITO measured in 0.1M TBAPF <sub>6</sub> /acetonitrile with Ag/Ag <sup>+</sup> reference and Pt wire counter electrodes, respectively.....                                                        | 8  |
| Figure S7. CIE <i>L*a*b*</i> color coordinates of a film of 5 from 3 in its original (+), oxidized (+) and neutral (+) states. ....                                                                                                                | 9  |
| Figure S8. Photographs of a film of 5 from 3 (bottom half) on ITO in its original (left), oxidized (middle), and neutral (right) states. The top half of the film is pristine 3 showing its non-electrochromic behavior.....                       | 10 |
| Figure S9. Photographs of exchanged polymer films obtained from 3 using different molar ratios of 1:4 (ratios are shown below pictures). For comparison, pristine 3 as well as 5 prepared from direct condensation of 1 and 4 are also shown. .... | 11 |
| Figure S10. Absorbance spectra of the films shown in Figure S9. ....                                                                                                                                                                               | 12 |
| Figure S11. CIE <i>L*a*b*</i> color coordinates of the films shown in Figure S9. ....                                                                                                                                                              | 13 |
| Figure S12. <sup>1</sup> H-NMR of pristine 7 obtained by constitutional component exchange from 1 and 6. ....                                                                                                                                      | 14 |
| Figure S13. <sup>13</sup> C NMR of pristine 7 obtained by constitutional component exchange from 1 and 6. ....                                                                                                                                     | 15 |
| Figure S14. High resolution mass spectrum of 7 obtained by constitutional component exchange from 1 and 6. ....                                                                                                                                    | 16 |
| Figure S15. Liquid chromatograph monitored at 254 nm of dichloromethane washings obtained from component exchange of 3 with an excess of 6. The peak at 6.9 min corresponds to unreacted 6. ....                                                   | 17 |
| Figure S16. Liquid chromatograph monitored by total ion count at <i>m/z</i> =573 of dichloromethane washings obtained from component exchange of 3 with an excess of 6.....                                                                        | 17 |
| Figure S17. ESI mass spectrum of the peaks from Figure S16 corresponding to 7.....                                                                                                                                                                 | 18 |
| Figure S18. Liquid chromatograph monitored at 254 nm of dichloromethane washings obtained from component exchange of 5 with an excess of 6. The peak at 6.9 min corresponds to unreacted 6. ....                                                   | 18 |
| Figure S19. ESI mass spectra of the peaks at 10.1 (left) and 11.0 (right) min. retention time (top) from the liquid chromatograph monitored as a function of total ion count (bottom).....                                                         | 19 |

## Experimental

### On-substrate polymerization of **3**

A 1 mL dichloromethane/acetone (9/1 v/v) solution of **1**/**2**/Sc(OTf)<sub>3</sub> in 1:1:0.13 molar ratio was sprayed onto 10 cm<sup>2</sup> glass or ITO slides using a compressed air spray-gun. The concentration of **1** was 2 mg/mL. The films were placed on a hot plate and covered with a glass crystallization dish. Two vials of trifluoroacetic acid (TFA; 1 mL) each were placed in the crystallization dish to obtain a TFA saturated environment. The substrates were heated at 90° C for 1 hour to ensure the polymerization of **3**. The substrates were then washed with 0.5 vol % triethylamine in dichloromethane to remove any oligomers/monomers and also to neutralize the polymer. The substrates were finally rinsed with neat dichloromethane.

### Exchange reaction to prepare **5** from **3**

A dichloromethane solution of **4** was sprayed onto films of **3** using the compressed air spray gun. The mole amount of **4** sprayed on to the films of **3** for dynamic component exchange was equal to the mole amount of **1** used on the same area for the polymerization of **3**. The substrates were heated at 120°C in the TFA saturated environment for 1 hour to complete the exchange. The substrates were subsequently washed as above.

### Patterning by dynamic component exchange

A dichloromethane solution of **6** was spray coated onto films of either **5** or **3** through a mask using the compressed air spray gun. An excess amount of **6** (~ 4 equivalents with respect to **1** used during polymerization on the same area) was necessary to obtain a soluble pattern. Lesser amounts of **6** yielded an insoluble pattern on the substrate. The substrates were then heated at 90°C in the acid saturated environment for 1 hour to complete the exchange. The substrates were then rinsed with the dichloromethane solutions similar to the previous methods.

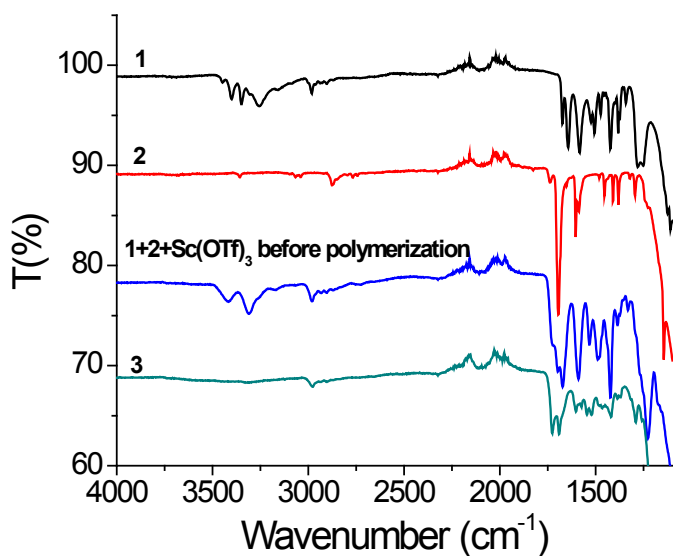

**Figure S1.** On-substrate polymerization of **1** and **2** followed by ATR-IR spectroscopy

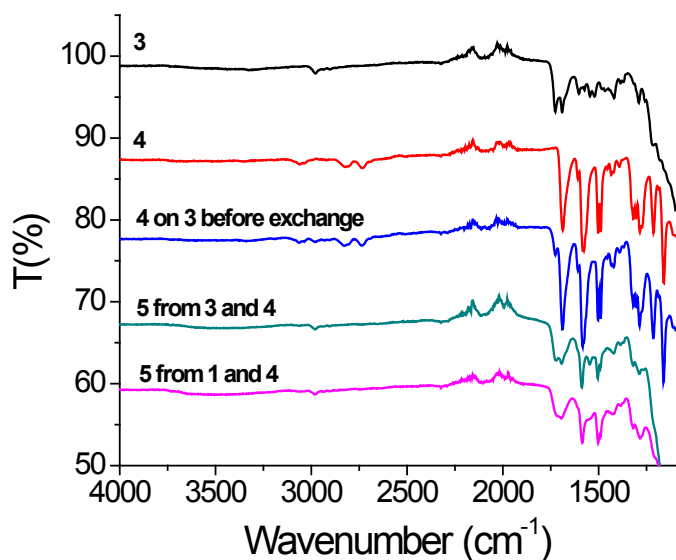

**Figure S2.** On-substrate preparation of **5** from **3** by exchange with **4** followed by ATR-IR spectroscopy. ATR-IR spectrum of **5** obtained by direct on-substrate condensation of **1** and **4** is also shown for comparison.

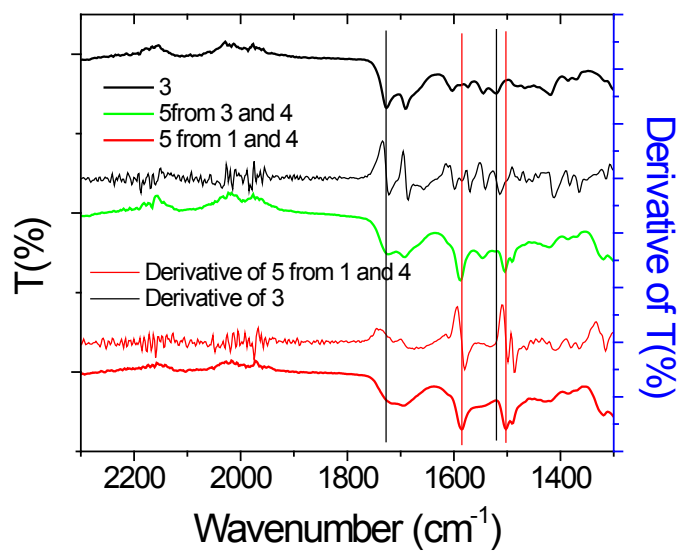

**Figure S3.** On-substrate preparation of **5** from **3** via exchange with **4** followed by ATR-FTIR spectroscopy. Derivative spectra of **3** and **5** from **1** and **4** are also shown.

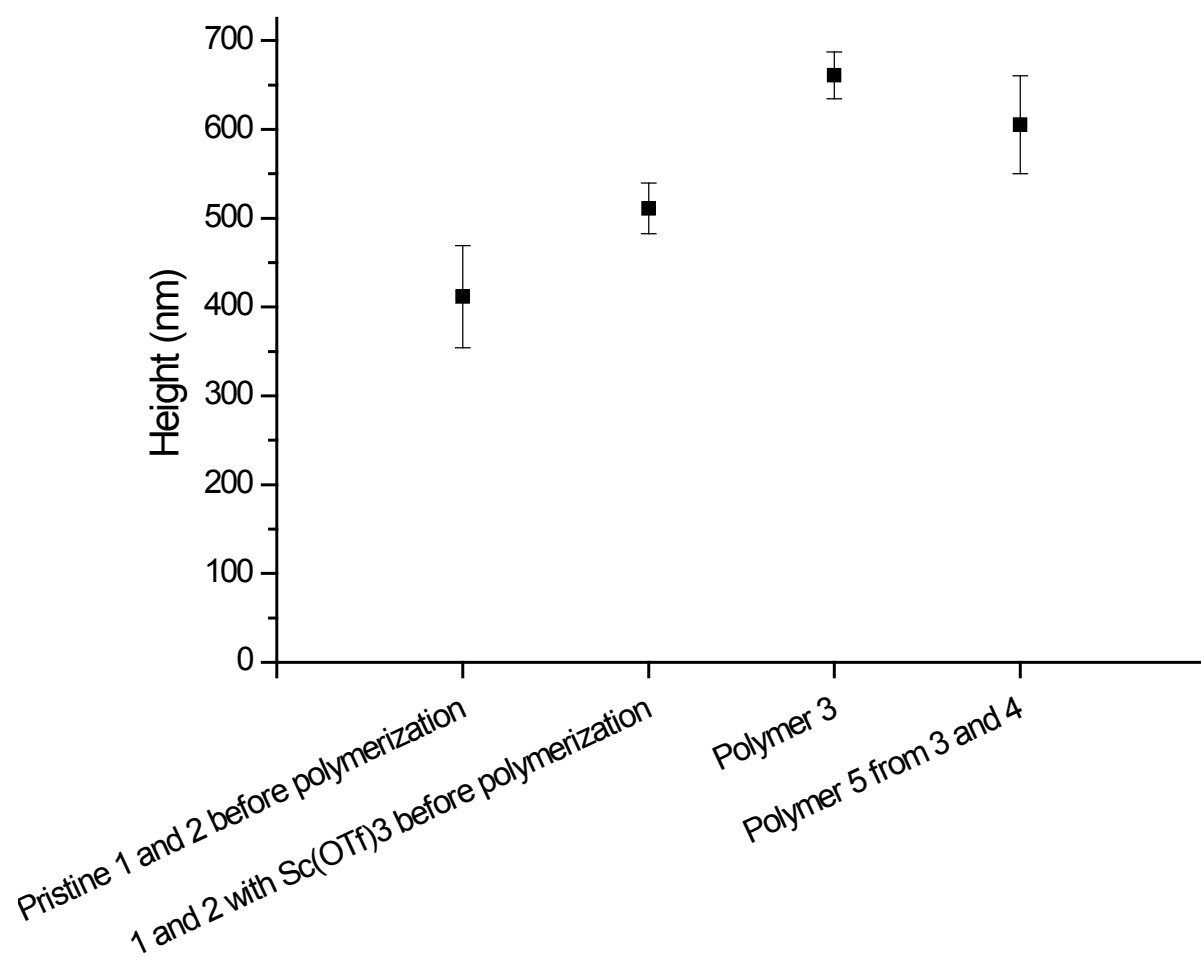

**Figure S4.** Average film thickness of spray coated films.

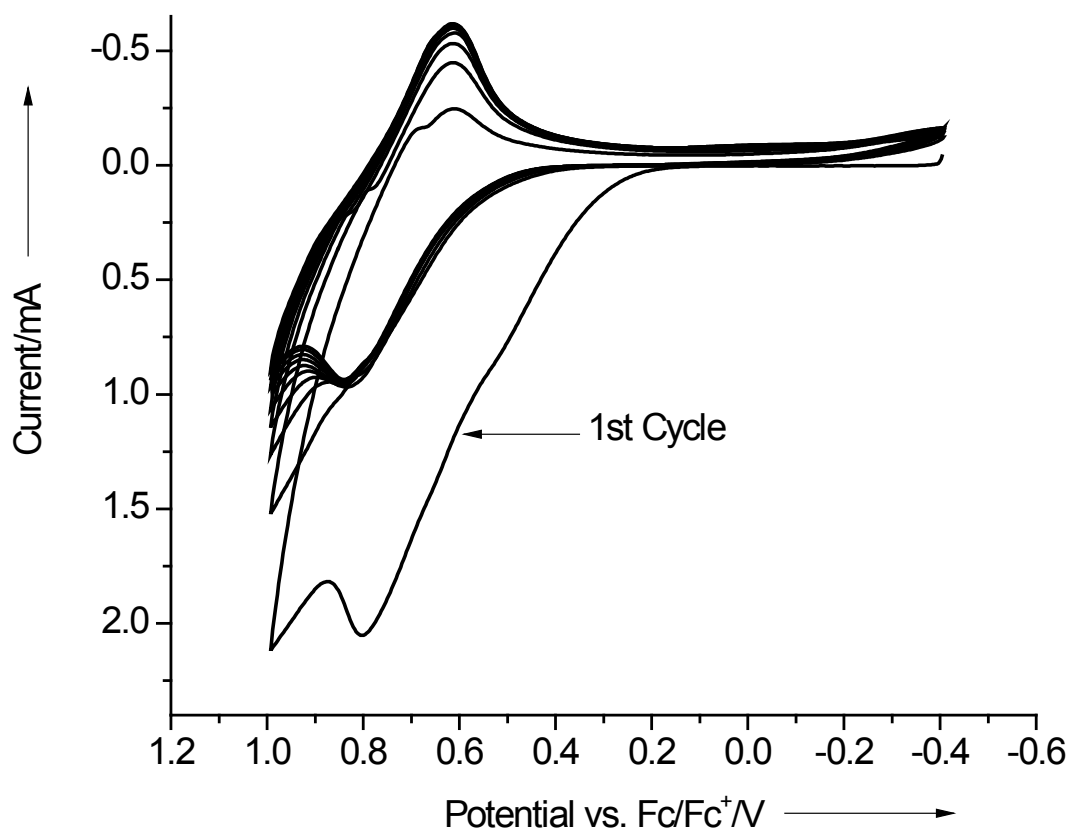

**Figure S5.** Cyclic voltammograms of a film of **5** from **3** on ITO measured in 0.1M TBAPF<sub>6</sub>/acetonitrile with Ag/Ag<sup>+</sup> reference and Pt wire counter electrodes, respectively.

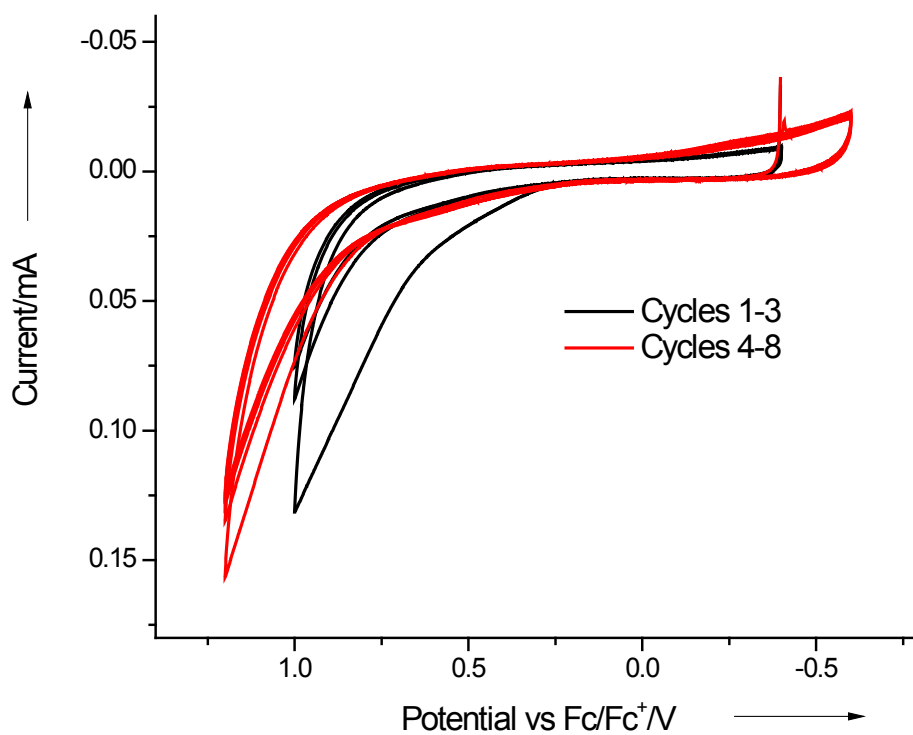

**Figure S6.** Cyclic voltammograms of a film of **3** on ITO measured in 0.1M TBAPF<sub>6</sub>/acetonitrile with Ag/Ag<sup>+</sup> reference and Pt wire counter electrodes, respectively.



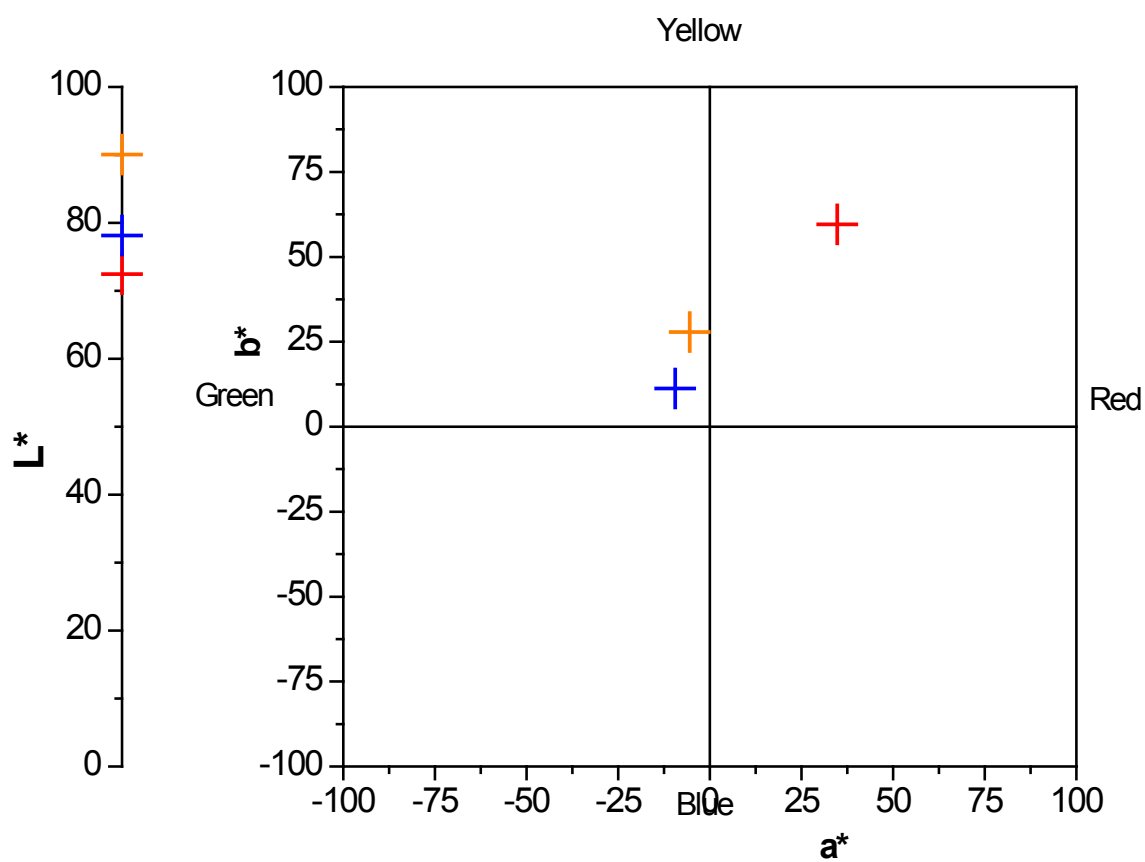

**Figure S7.** CIE  $L^*a^*b^*$  color coordinates of a film of **5** from **3** in its original (+), oxidized (+) and neutral (+) states.

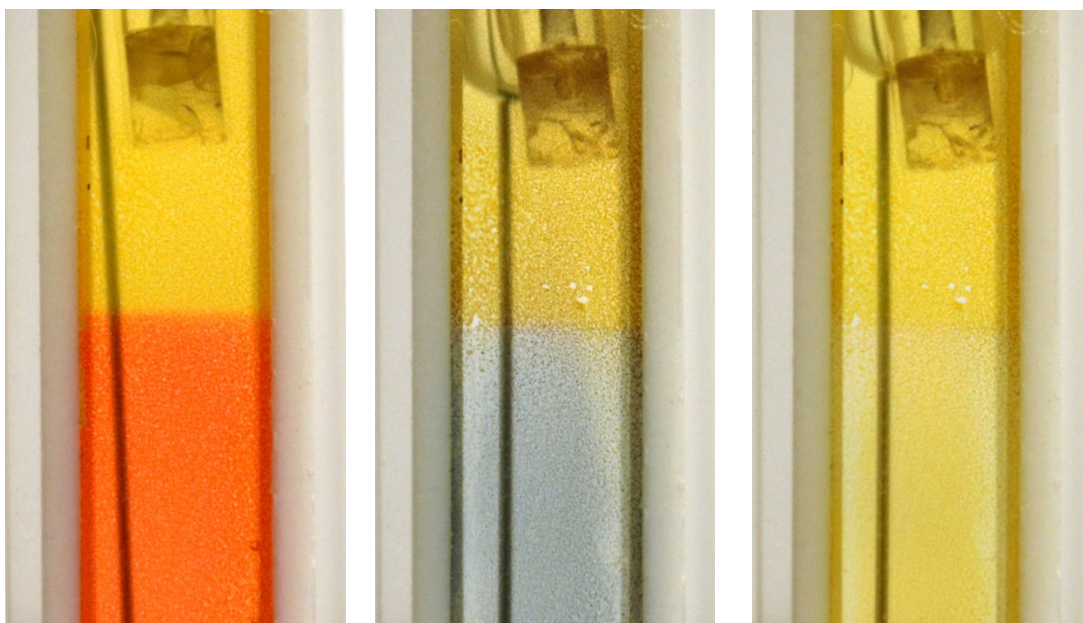

**Figure S8.** Photographs of a film of **5** from **3** (bottom half) on ITO in its original (left), oxidized (middle), and neutral (right) states. The top half of the film is pristine **3** showing its non-electrochromic behavior.

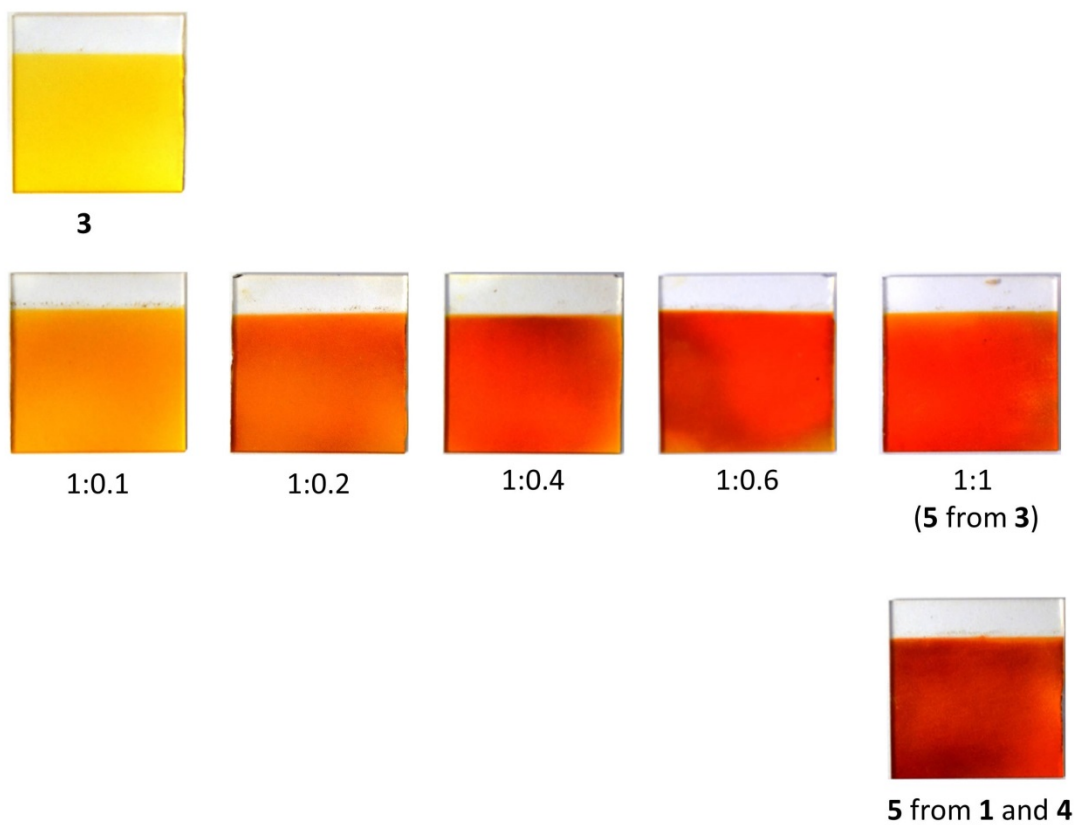

**Figure S9.** Photographs of exchanged polymer films obtained from **3** using different molar ratios of **1:4** (ratios are shown below pictures). For comparison, pristine **3** as well as **5** prepared from direct condensation of **1** and **4** are also shown.

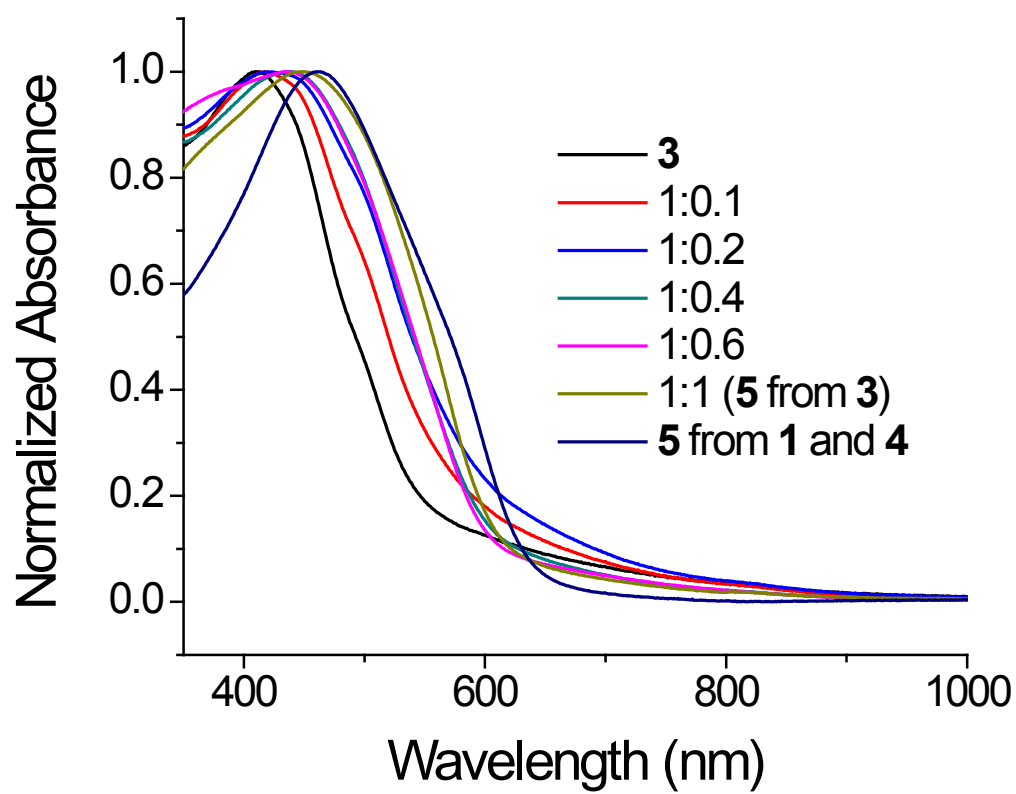

**Figure S10.** Absorbance spectra of the films shown in Figure S9.

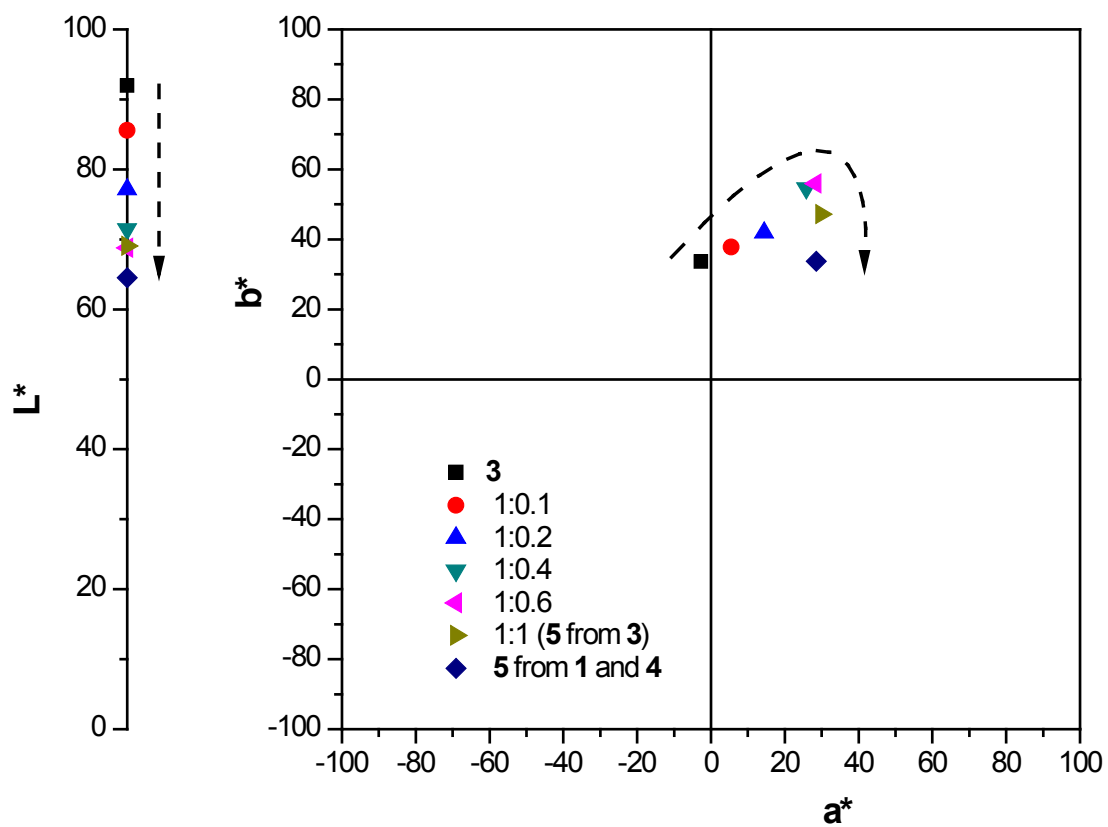

**Figure S11.** CIE  $L^*a^*b^*$  color coordinates of the films shown in Figure S9.

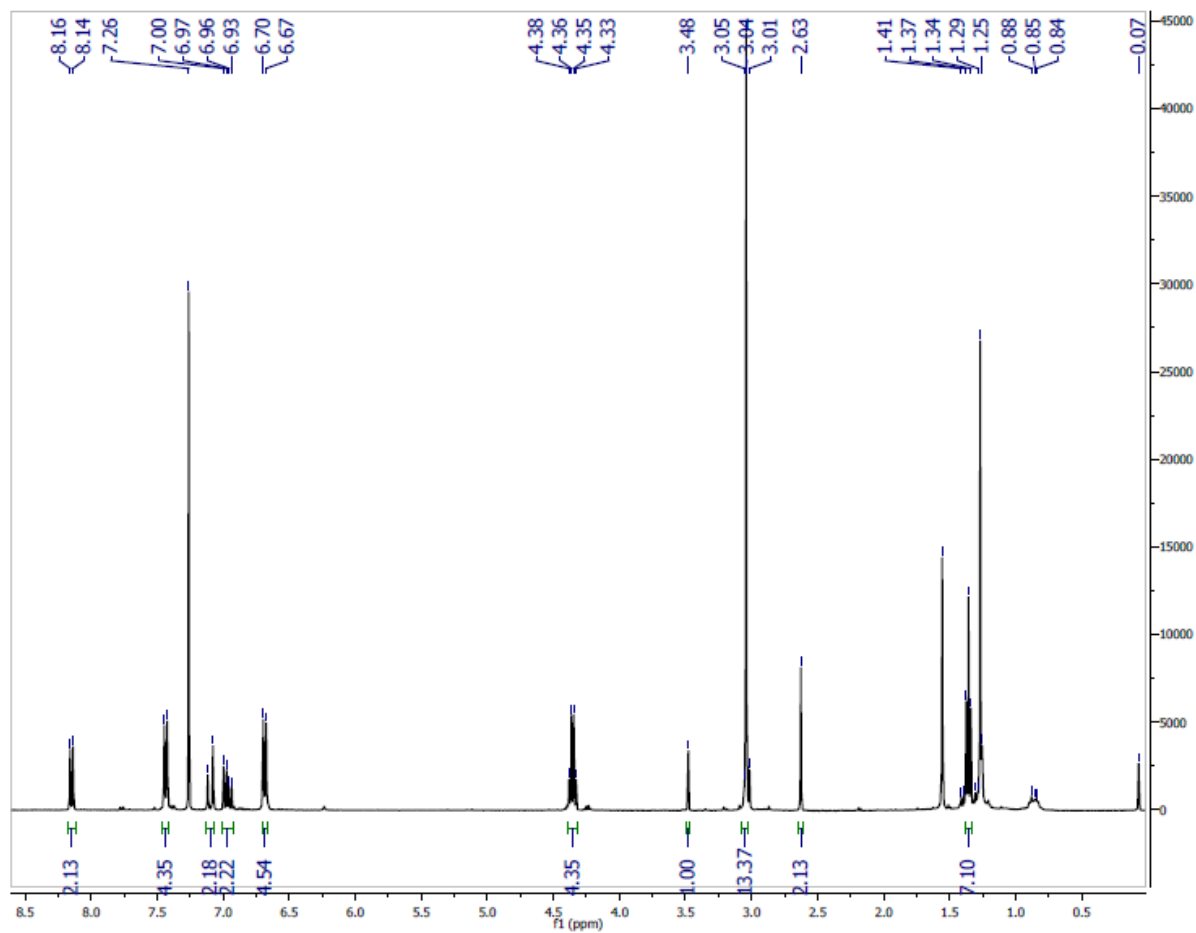

**Figure S12.** <sup>1</sup>H-NMR of pristine 7 obtained by constitutional component exchange from 1 and 6.

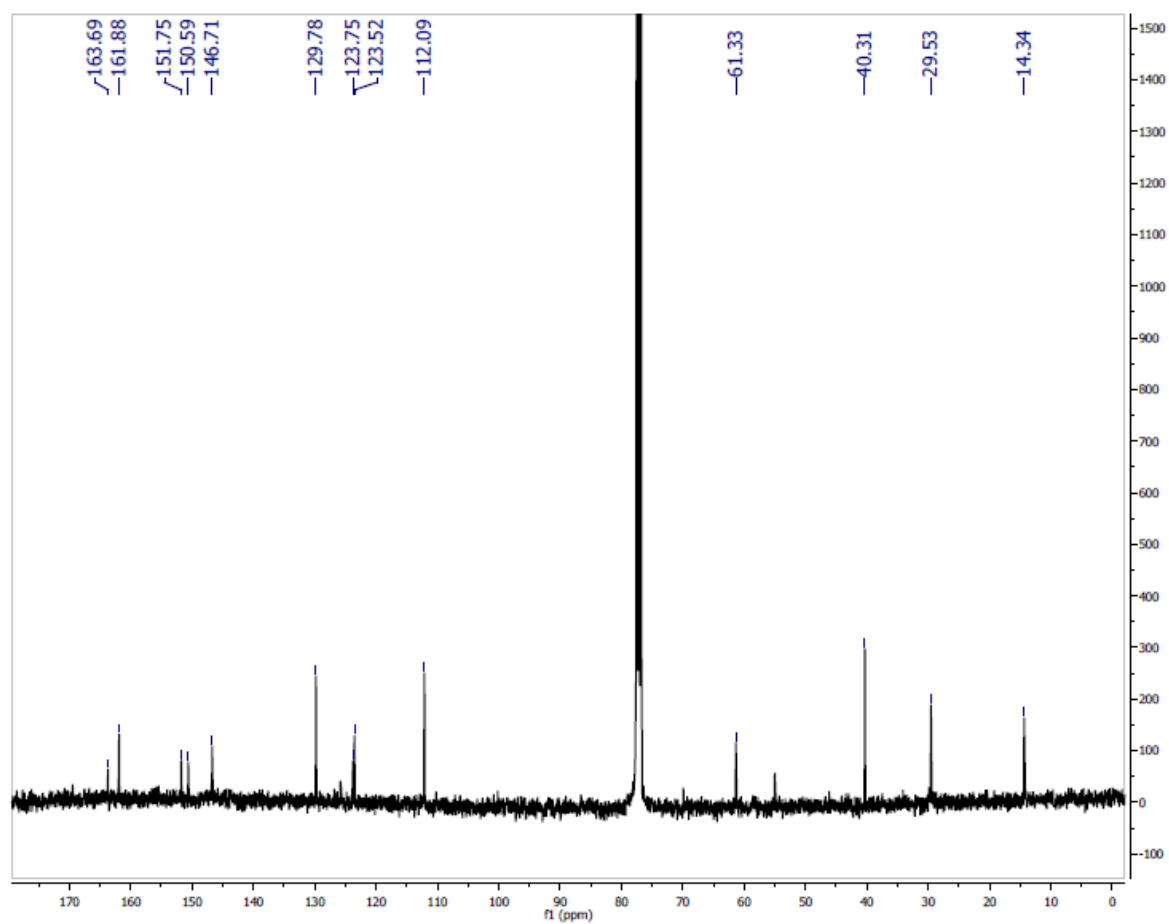

**Figure S13.**  $^{13}\text{C}$  NMR of pristine 7 obtained by constitutional component exchange from 1 and 6.

## Analysis Report

**Data File** DN-1.d      **Sample Name** DN-1  
**User Name** Karine      **Acq Method** APCI\_POS\_DIR.m  
**Acquired Time** 9/26/2012 9:24:35 AM      **DA Method** HRMS.m  
**Comment**

### MS Spectrum

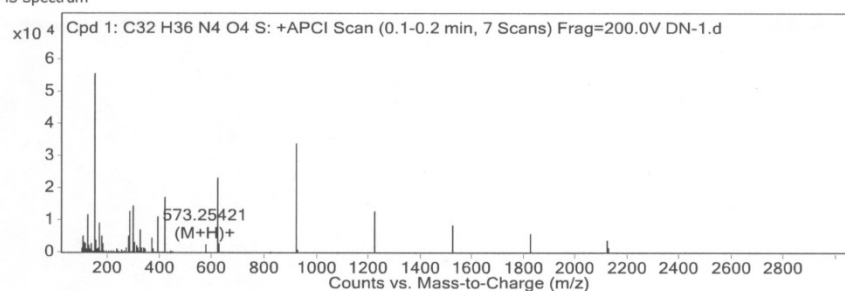

### MS Zoomed Spectrum

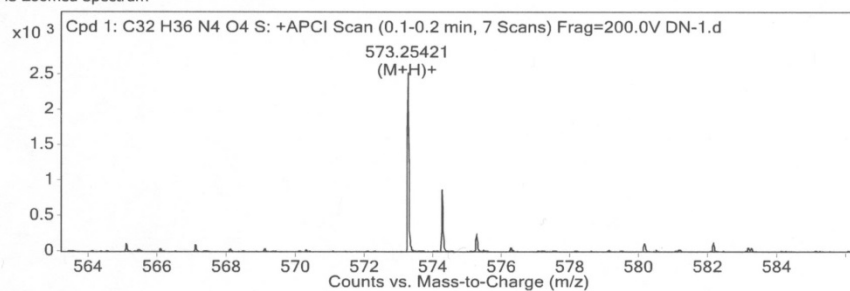

### MS Spectrum Peak List

| Ion    | Formula                                                         | Abund    | Observed m/z | Calc m/z | Diff(ppm) |
|--------|-----------------------------------------------------------------|----------|--------------|----------|-----------|
|        |                                                                 | 58353.33 | 149.02514    |          |           |
| (M+H)+ | C <sub>32</sub> H <sub>37</sub> N <sub>4</sub> O <sub>4</sub> S | 2539.96  | 573.25421    | 573.253  | 1.2       |

**Figure S14.** High resolution mass spectrum of **7** obtained by constitutional component exchange from **1** and **6**.



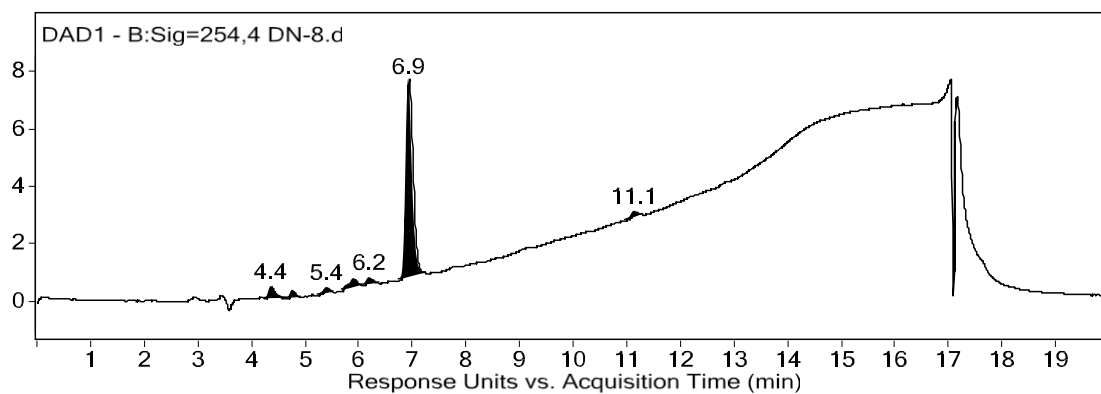

**Figure S15.** Liquid chromatograph monitored at 254 nm of dichloromethane washings obtained from component exchange of **3** with an excess of **6**. The peak at 6.9 min corresponds to unreacted **6**.

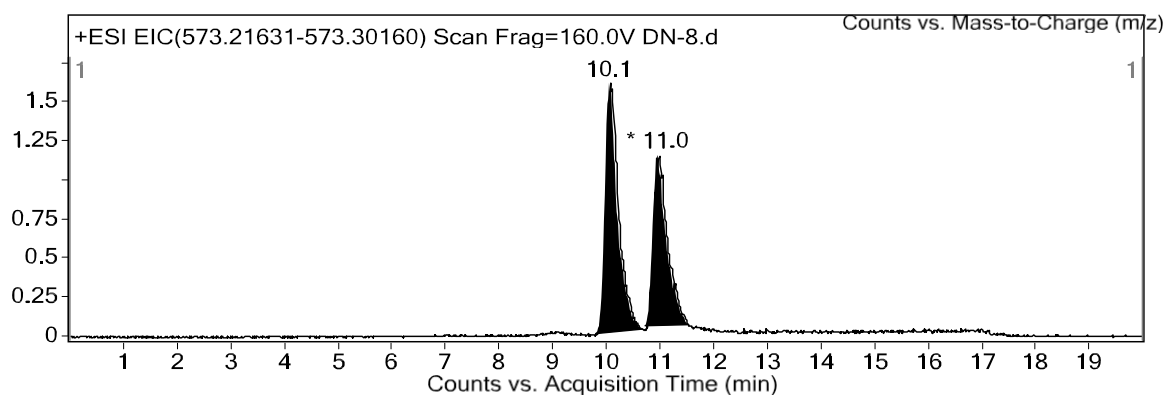

**Figure S16.** Liquid chromatograph monitored by total ion count at  $m/z=573$  of dichloromethane washings obtained from component exchange of **3** with an excess of **6**.

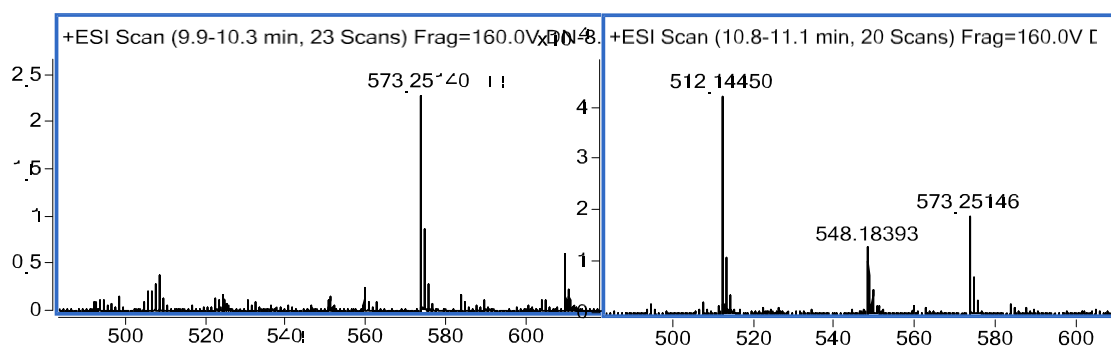

**Figure S17.** ESI mass spectrum of the peaks from Figure S16 corresponding to **7**.

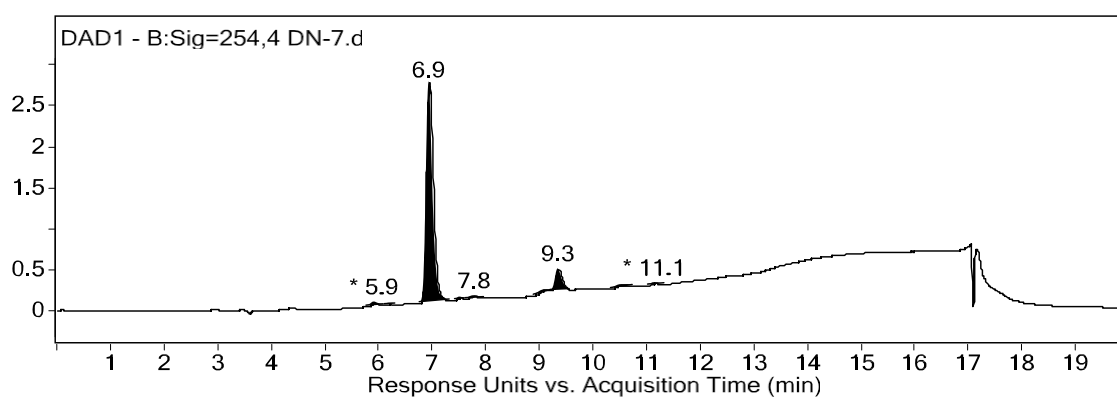

**Figure S18.** Liquid chromatograph monitored at 254 nm of dichloromethane washings obtained from component exchange of **5** with an excess of **6**. The peak at 6.9 min corresponds to unreacted **6**.

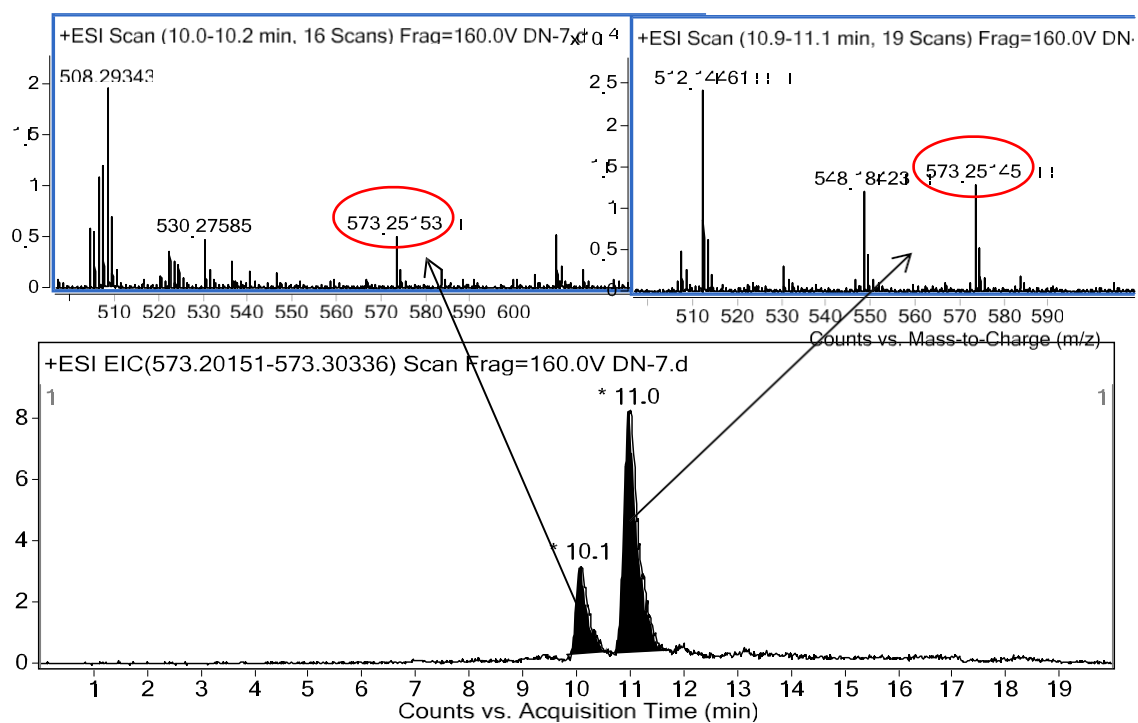

**Figure S19.** ESI mass spectra of the peaks at 10.1 (left) and 11.0 (right) min. retention time (top) from the liquid chromatograph monitored as a function of total ion count (bottom).
